# Supplementary material for: Assessing the Acceptability of Digital Financial Services and Associated Factors, Opportunities, and Challenges in Burundi's Health Sector
Source: Research Square preprint supplement (doi:10.21203/rs.3.rs-7655590/v1), 2025-11-10
Supplement: Supplementary file 1 [file d9b65fdf46d9e2e419501582.docx]

**Questionnaire**

1. **Identification**
2. Age (Years)
   - ≤29
   - 30-39
   - 40-49
   - ≥50
3. Sex
   - Male
   - Female
4. Location of health district :
   - Urban
   - Rural
5. Type of institution
   - Ministry of Health
   - Provincial health bureau
   - Health district
   - Hospital
   - Private clinic
   - Health center
6. Healthcare provider’s category

- Doctor
- Paramedical staff
- Community Healthcare Worker
- Support staff

1. Do you have a bank account?

- Yes
- No

1. Do you have a mobile phone with an active phone number

- Yes
- No

1. Have you ever performed a monetary transaction using a mobile phone?

- Yes
- No

1. By which way do you receive your salary?

- Bank
- Cash payment
- Mobile phone

1. Have you ever participated in a vaccination campaign?

- Yes
- No

1. What was the payment method?

- Bank
- Cash
- Mobile phone
- Not applicable

1. Which payment method would you consider?

- Bank
- Cash payment
- Mobile phone
- Other

1. If by mobile phone, why?

- Fast salary perception
- Fast withdrawal and transfer of money
- Low withdraw charge
- No additional charges

1. Which of the following electronic payment platforms have you already used?

- Bancobu e-noti
- BCB Muhira
- Lumicash
- Ecocash
- Western Union
- Mpesa

1. Do you think digital payment can improve or impact vaccination campaigns or healthcare delivery?

- Yes
- No

1. If Yes, how?

- No time wasted queuing at the bank
- Motivation by fast money perception
- Minimal expenses for transportation
- Ease of transactions
- Other:

1. Do you have any idea about Digital Financial Services or Digital payment?

- Yes
- No

1. What are its advantages?

- Facilitate transactions
- Ensure salary security
- Decrease transfer and withdrawal fees
- Ensure prompt payment of salary
- Other:

1. What are the disadvantages

- High transfer and withdrawal fees
- Forgetting individual passcode
- Limitation of the amount of money to transfer
- Difficulty in getting change back in case of mistake
- Loss of mobile phone
- High transactions fee
- Other  :

1. According to you, what may the challenges associated to the digital payment?

- Lack of a mobile phone
- Non Access to power
- Repeated power outage
- Theft of phones
- Mobile phone breakdown

1. Which one of the following platforms may be the best?

- Bancobu e-noti
- BCB Muhira
- Lumicash
- Ecocash
- Western Union
- Mpesa

1. At which level the digital payment methods may be efficacious in comparison with the existing ones?

- Excellent efficacy
- Average efficacy
- No efficient

1. What are the necessary conditions for you to join the digital payment?

- To buy a mobile phone
- To have electricity at home
- To by a solar panel
- Other :
